# Supplementary material for: 334-year coral record of surface temperature and salinity variability in the greater Agulhas Current region
Source: Copernicus journal article supplement (doi:10.5194/cp-2021-120), 2021-09-22
Supplement: Supplementary file [file cp-2021-120-AC2-supplement.pdf]

1 **Point-by-point response**

2 We thank both reviewers for their constructive comments which we address briefly in this  
3 response.

4  
5 **Reviewer 2:**

6  
7 **1) Add details on which samples were drilled in previous studies and which ones for this**  
8 **study...some fine tuning of wording around use of growth banding or high-resolution**  
9 **oxygen isotopes profiles**

10  
11 Answer:

12 For information, current methods states: “We resampled the Ifaty-4 core at annual resolution  
13 for Sr/Ca, except for multidecadal periods subsampled previously at bimonthly resolution  
14 (Zinke et al., 2004) following the established and precise age model of the high-resolution  $\delta^{18}\text{O}$   
15 sampling from austral summer to summer in any given annual cycle. Cores Ifaty-1 and Tular-  
16 3 were sampled at annual resolution along the major growth axis following the density pattern  
17 from summer to summer in any given annual cycle, established from X-ray-radiograph-positive  
18 prints. “

19 We will clarify the use of previous and new data in a Supplementary Table.

20  
21 **2) Simplify description of Monte Carlo approach for seawater oxygen isotope**  
22 **reconstructions...clarify if Monte Carlo approach was also used for 1881-1661 section.**

23  
24 Answer:

25 See our comment to Rev. 1.

26 The Monte Carlo approach was used for all data including the 1881 to 1661 section, as  
27 described in methods.

28  
29 **3) Why was average Sr/Ca-SST slope used? Why HadISST for  $\delta^{18}\text{O}_{\text{seawater}}$  reconstruction**  
30 **and not ERSST?**

31  
32 Answer:

33 We did not use the average proxy-SST slopes alone, the Monte Carlo approach applies slope  
34 errors randomly. It reads: “Monte Carlo parameters are calculated by adding random values on  
35 the proxy-SST slopes, Sr/Ca, and  $\delta^{18}\text{O}$  (random values are normally distributed numbers in the  
36  $1 \sigma$  range of slope errors and analytical errors, respectively).” Thus, we fully take into account  
37 uncertainties in slope estimates reported in the literature.

38  
39 HadISST was used to cross-check the  $\delta^{18}\text{O}_{\text{seawater}}$  reconstruction based on Sr/Ca-SST with a  
40 different SST dataset than ERSST5. By doing so, we assessed if results would improve by  
41 using reconstructed SST from observations at 1x1 degree spatial resolution instead of Sr/Ca-  
42 SST for a longer period of time. We have done the  $\delta^{18}\text{O}_{\text{seawater}}$  reconstruction with ERSST5 as  
43 well, see Figure 2 of this response. We observe close agreement in long-term changes for the  
44 majority of the past 140 years (see Figure 2 of this response).

45  
46 **4) Improve discussion of model results in comparison to coral-based reconstructions.**

47  
48 Answer: See response to reviewer 1 above.

49

50 **Minor comments:**

51

52 Line 17: Might be helpful to define the acronyms for sea-surface temperature and salinity  
53 as they're used later in the abstract.

54

55 Answer: Done.

56

57 Line 22: please indicate the full time period of comparison (1958-1995?)

58

59 Answer: Done.

60

61 Line 38: both “inter-ocean” and “interocean” appear in the manuscript. Use one or the  
62 other for consistency.

63

64 Answer: inter-ocean now used consistently

65

66 Line 42: possible formatting issue on one of the references?

67

68 Answer: Corrected.

69

70 Line 78: This is the first mention of  $\delta^{18}\text{O}$ . It might be “spelling out” what the  $\delta^{18}\text{O}$   
71 notation stands for.

72

73 Answer: Changed to “...Measurements of the  $\delta^{18}\text{O}$  in seawater (hereafter  $\delta^{18}\text{O}_{\text{seawater}}$ ),...”

74

75 Line 170: One occurrence of “for SST” can be removed.

76

77 Answer: Corrected.

78

79 Line 160: The -0.22 per mil/deg C relationship pre-dates Thompson et al., 2011. Please use  
80 the appropriate reference here.

81

82 Answer: Added: Lough, 2004.

83

84 Lines 202-205: Interestingly the  $\delta^{18}\text{O}$ -SST variability appears to be more consistent with  
85 ERSST than Sr/Ca-SST (which has some very large spikes that aren't observed in  
86 temperature). Any thoughts on why this is the case?

87

88 Answer:

89 Up to 1890,  $\delta^{18}\text{O}$ -SST apparently agrees better with ERSST than Sr/Ca-SST. Pre-1890,  $\delta^{18}\text{O}$ -  
90 SST deviates from ERSST more than Sr/Ca-SST. Between 1942 to 1995, both proxies perform  
91 equally well. Between 1854 and 1910, Sr/Ca-SST outperforms  $\delta^{18}\text{O}$ -SST, most probably due  
92 to greater impacts of  $\delta^{18}\text{O}_{\text{seawater}}$  variations (already suggested by Zinke et al., 2004). Especially  
93 between 1910 and 1940, Sr/Ca-SST shows higher magnitude variability for the most recent  
94 period. We suggest that Sr/Ca-SST may better reflect local SST variations at the reef site and  
95 between reefs which at times may be higher than recorded by the dual proxy  $\delta^{18}\text{O}$  (influenced  
96 by SST and  $\delta^{18}\text{O}_{\text{sw}}$ ) or the coarse gridded ERSST.

97 As stated in the manuscript, we also expect the annual mean  $\delta^{18}\text{O}$ -SST record to perform better  
98 for parts of the 20<sup>th</sup> century and pre-1890 because 1 core (Ifaty-4) has been previously sampled  
99 and measured at higher resolution (monthly 1920-1995; bimonthly 1919-1661) while Sr/Ca is

100 largely based on annual mean samples for all cores. Thus, annual sampling leads to overall  
101 larger uncertainties in reconstructed Sr/Ca-SST for individual years than higher resolution  
102 sampling. These uncertainties are propagated by our Monte Carlo approach.

103

104 Line 205: Are these trends? If so, please include the term “trend” in the sentence. Also,  
105 both numbers are consistent which is nice!

106

107 Answer: “trend” now included in sentence

108

109 Figure 1: I’d recommend using a different light color to represent the errors in panels a-c  
110 (maybe gray) so that the median of each reconstruction is more visible. This is more of an  
111 issue with the panel A where the shades of red are very close to each other.

112

113 Answer: We have changed the median line in panel a. See comment to Rev. 1.

114

115 Line 240+: the use of both NST and SST is confusing. Using NST alone for this  
116 presentation is fine. Same goes for NSS/SSS.

117

118 Answer: NST is the correct description of model data. We have now clarified in methods  
119 why we use NST instead of SST for the model data.

120

121 Line 330: This sentence might be missing a few words?

122

123 Answer: Unclear what the reviewer refers to.

124

125 Line 395: This sentence might be too strong and casts a lot of doubt the observations in  
126 the rest of the paragraph, especially given the evidence from the literature presented in  
127 the next paragraph that supports more ENSO activity in the 16th century.

128

129 Answer: We have referred to studies that show enhanced interannual ENSO-band variability  
130 in the 17<sup>th</sup> century and at the turn to the 18<sup>th</sup> century, not the 16<sup>th</sup> century. It’s unclear what the  
131 reviewer refers to here.

132

133 Line 400: Cobb 2003 is a more appropriate reference

134

135 Answer: Cobb, 2003 added

136

137 Line 402: Is this the same coral used in this study? If so, using it to support the results is  
138 somewhat circular. If it’s a different core, it might be worth mentioning so others don’t  
139 make the same assumption.

140

141 Answer: We now make it clear that it is related to the previous study.

142
